# Supplementary material for: Liver-Directed AAV8 Booster Vaccine Expressing Plasmodium falciparum Antigen Following Adenovirus Vaccine Priming Elicits Sterile Protection in a Murine Model
Source: PubMed Central journal article supplement (PMC8261234; doi:10.3389/fimmu.2021.612910), 2021-06-23

**Supplementary figure 1**

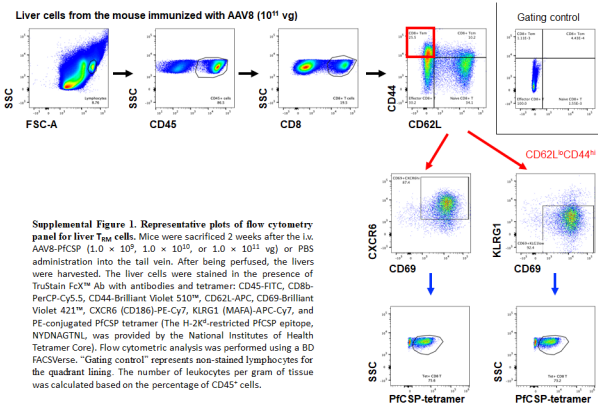

Supplementary figure 1, continued

Liver cells from the mouse immunized with AAV8 ( $10^{11}$  vg)

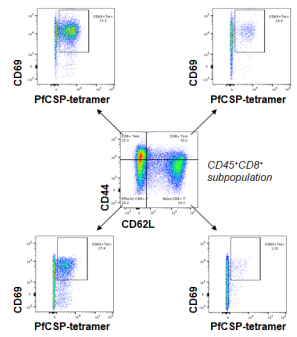

Liver cells from the non-immunized mouse

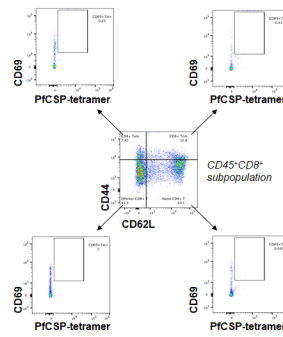

Supplement: DataSheet_1.pdf [file DataSheet_1.pdf]
