# Supplementary material for: Liver-Directed AAV8 Booster Vaccine Expressing Plasmodium falciparum Antigen Following Adenovirus Vaccine Priming Elicits Sterile Protection in a Murine Model
Source: PubMed Central journal article supplement (PMC8261234; doi:10.3389/fimmu.2021.612910), 2021-06-23
Supplement: Table_1.pdf [file Table_1.pdf]

**Supplementary Table 1.**

Oligonucleotide primer sets used to quantify the *pfcsp* gene levels in the liver. The mouse *gapdh* gene was used for normalization.

| Primer Name | Primer Sequence            |
|-------------|----------------------------|
| pGAPDH-F    | 5'-TGCCCCCATGTTTGTGATG-3'  |
| pGAPDH-F    | 5'-TGTGGTCATGAGCCCTTCC-3'  |
| pPfCSP-F    | 5'-ACAATGAAGAGCCCTCCGA-3'  |
| pPfCSP-R    | 5'-ACTGCCGGGTTTGATCCTTA-3' |
